# Supplementary material for: Daptomycin in the Clinical Setting: 8-Year Experience with Gram-positive Bacterial Infections from the EU-CORESM Registry
Source: PubMed Central journal article supplement — Adv Ther. 2015 Jun 25;32(6):496–509. doi: 10.1007/s12325-015-0220-6 (PMC4486780; doi:10.1007/s12325-015-0220-6), 2015-06-25
Supplement: 12325_2015_220_MOESM1_ESM.pdf [file 12325_2015_220_MOESM1_ESM.pdf]

- EU-CORE<sup>SM</sup> was a retrospective, non-interventional, multicenter study, which included 6075 patients and evaluated the safety and effectiveness of daptomycin in patients with Gram-positive infections treated between January 2006 and April 2012, across 18 countries, with 2-year follow-up data until 2014.
- The most common primary infections were complicated skin and soft tissue infection (31.7%) and bacteremia (20.7%), and the most frequently reported pathogen was *Staphylococcus aureus* (42.9%; methicillin-resistant, 23.2%).
- This retrospective analysis from the real-world experience showed that daptomycin was effective and well tolerated.
- The majority of patients with endocarditis, intracardiac/intravascular device infection, osteomyelitis, or orthopedic device infection remained relapse-free during the 2-year follow-up period.
- The 8-year clinical experience provided evidence that daptomycin is a potential treatment option in the management of various difficult-to-treat Gram-positive infections.

This summary slide represents the opinions of the authors. Sponsorship, article processing charges, and the open access charge for this study were funded by Novartis Pharma AG. Medical writing support was provided by Anupama Tamta (Novartis Healthcare Pvt. Ltd.) and Farid Khalfi (Novartis Ireland Ltd.), and was funded by Novartis Pharma AG. For a full list of acknowledgments and conflicts of interest for all authors of this article, please see the full text online. Copyright © The Author(s) 2015. Creative Commons Attribution Noncommercial License (CC BY-NC).
